# Supplementary material
Source: Royal Society of Chemistry journal article supplement (doi:10.1039/d5fb00634a)
Supplement: d5fb00634a1.pdf [file d5fb00634a1.pdf]

Formulation of dough

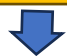

Mixing all the ingredients

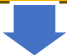

Addition of Heiyai SFE spent powder at different levels 0,2%, 5%, 10% and 15%(w/w)

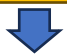

Baking at 160°C for 20 min

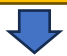

Cooling for 30 min

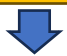

Stored in air tight container at room temperature prior analysis

Steps for preparation of Heiyai cookies

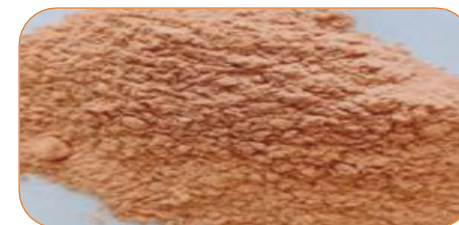

Heiyai SFE spent

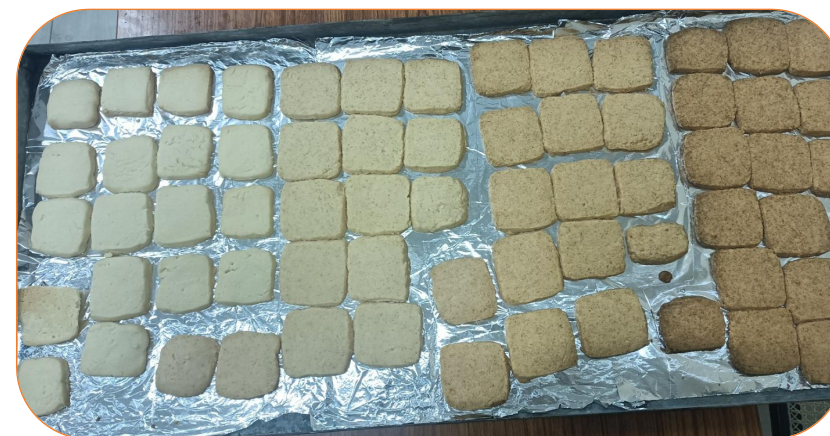

Heiyai Cookies

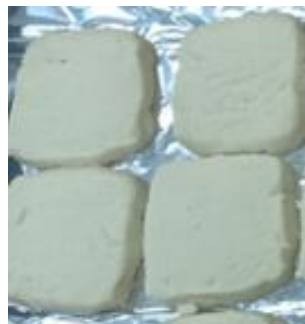

0%

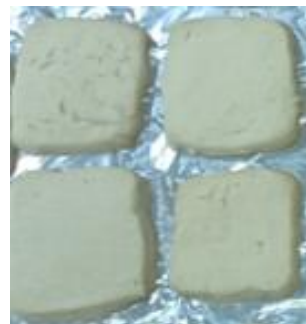

2%

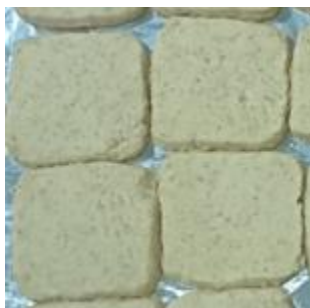

5%

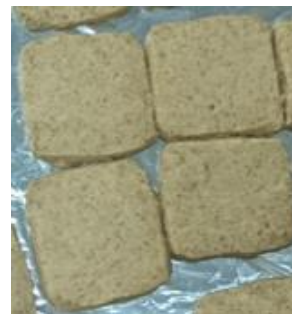

10%

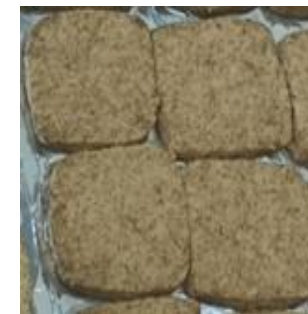

15%

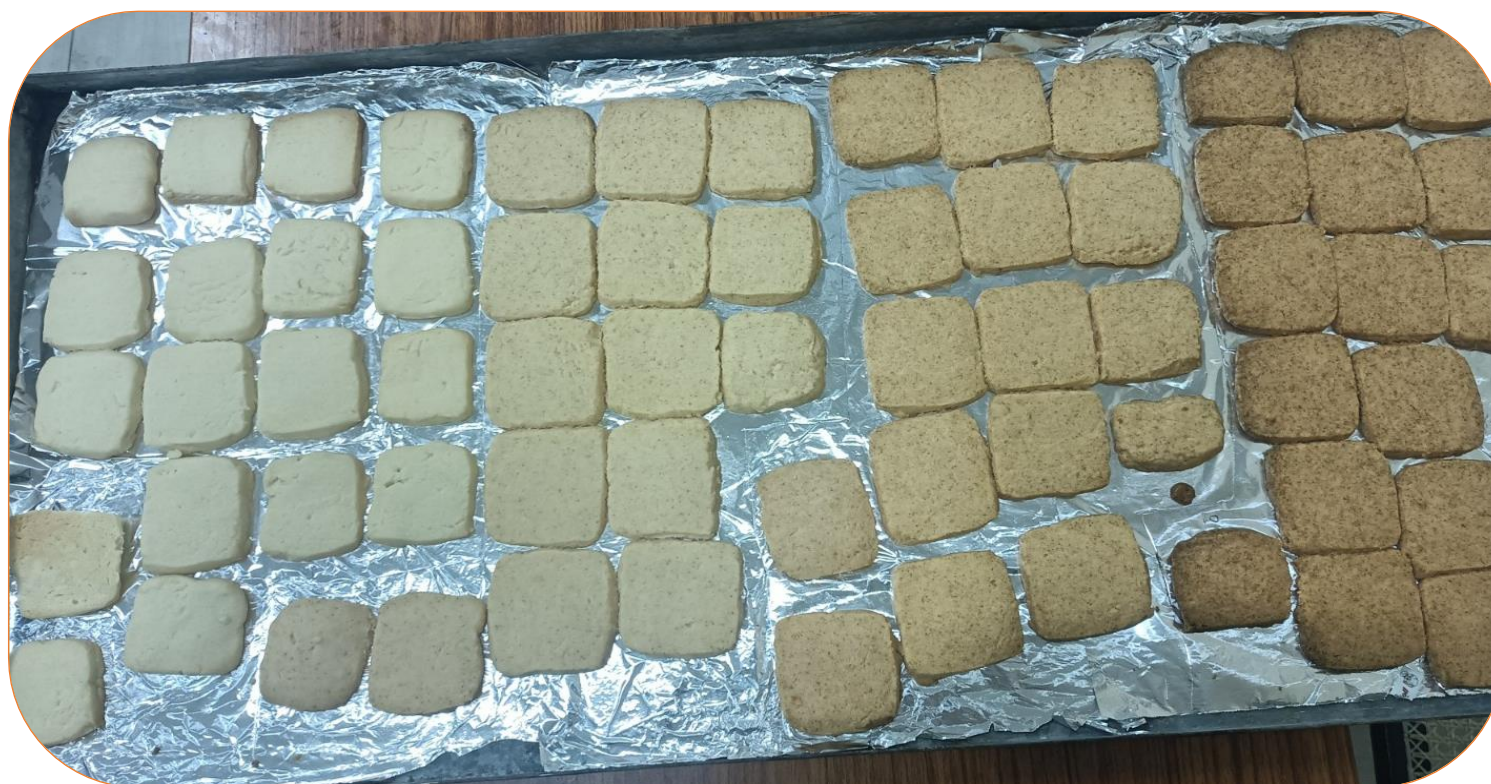

Figure S1: Cookies incorporated with Heiyai SFE spent powder at different levels 0,2%, 5%, 10% and 15%(w/w)

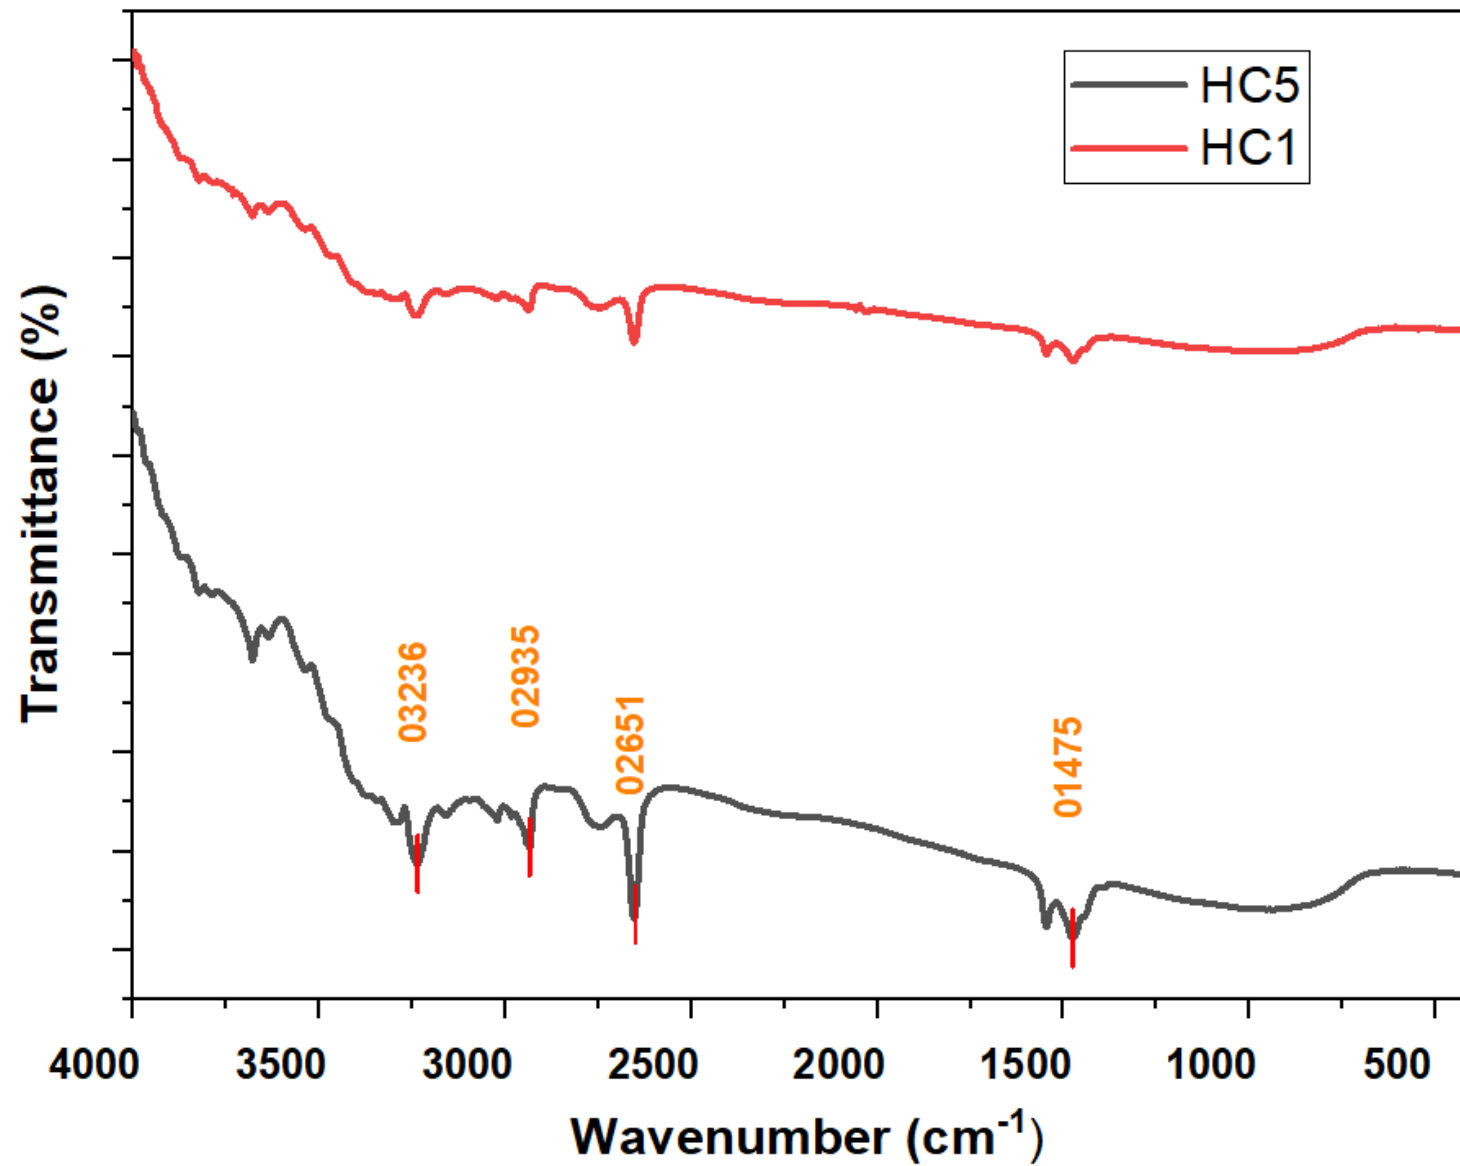

Figure S2 : FTIR spectra of HC1 and HC5 cookies
